# Supplementary material for: In situ reduction of well-dispersed nickel nanoparticles on hierarchical nickel silicate hollow nanofibers as a highly efficient transition metal catalyst
Source: Royal Society of Chemistry journal article supplement (doi:10.1039/c6ra01529h), 2016-01-01
Supplement: c6ra01529h1.pdf [file c6ra01529h1.pdf]

## Supporting Information

### In situ reduction of well-dispersed nickel nanoparticles on hierarchical nickel silicate hollow nanofibers as a high efficient transition metal catalyst

Yang Yang,<sup>a</sup> Renxi Jin,<sup>a</sup> Shuo Zhao,<sup>b</sup> Jihong Liu,<sup>a</sup> Yunfeng Li,<sup>a</sup> Xiaodan Yu,<sup>a</sup> Zhan Shi,<sup>c</sup> Yan Xing\*<sup>a</sup>

<sup>a</sup> Jilin Provincial Key Laboratory of Advanced Energy Materials, Department of Chemistry, Northeast Normal University, Changchun 130024 (P. R. China)  
E-mail: xingy202@nenu.edu.cn; Tel:+86-431-85099657

<sup>b</sup> Department of chemistry, Carnegie Mellon University, Pittsburgh, Pennsylvania, USA

<sup>c</sup> State Key Laboratory of Inorganic Synthesis  
and Preparative Chemistry  
Jilin University  
Changchun 130012 (P.R. China)

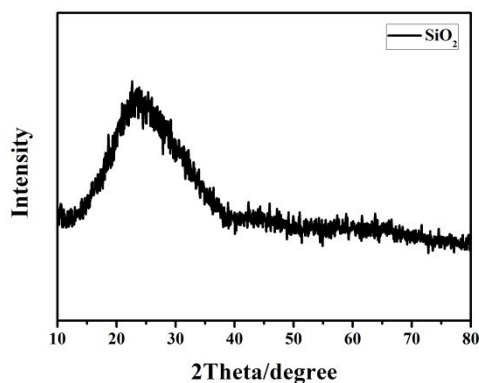

Figure S1. XRD patterns of SHNFs.

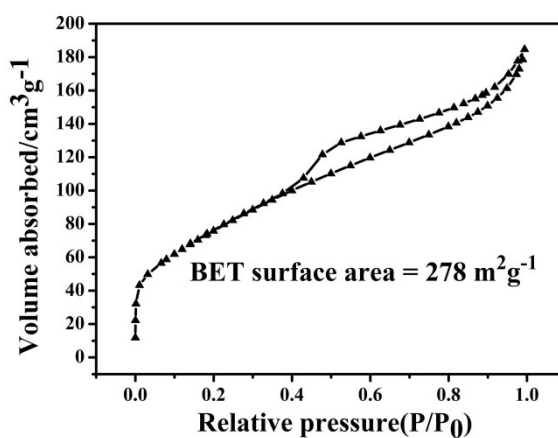

Figure S2. Nitrogen adsorption-desorption isotherm of NiNPs/NSHNFs.

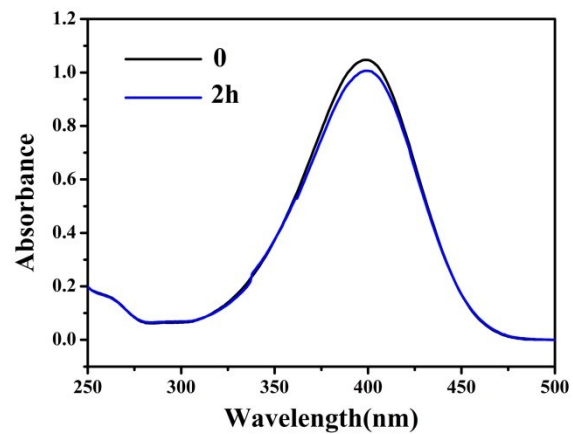

Figure S3. UV/Vis absorption spectra during the catalytic reduction of 4-NP over NSHNFs.

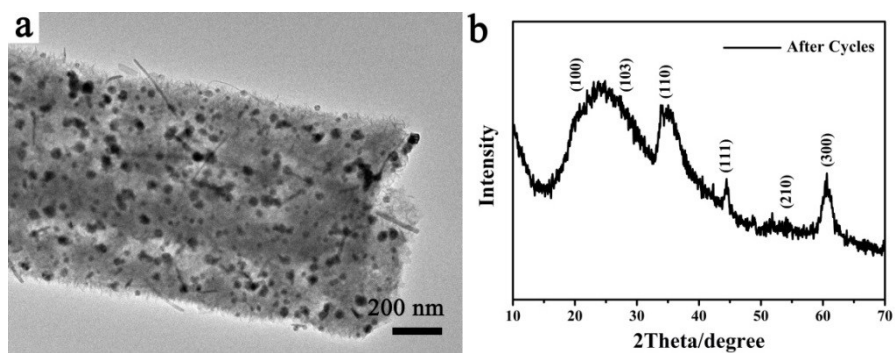

Figure S4. TEM image (a) and XRD pattern (b) of NiNPs/NSHNFs nanocomposites after 5 cycles of the catalytic reduction reaction.
